# Supplementary material for: Differentiating Functional Cognitive Disorder from Early Neurodegeneration: A Clinic-Based Study
Source: MDPI journal article supplement (doi:10.3390/brainsci11060800), 2021-06-17
Supplement: s1 [file s1]

**Supplementary material. Table S1.** MMPI-2-RF profiles (FCD group only)

Using the full sample of 20 participants with FCD, the mean number of items unscorable (including marked “cannot say”) was 19 (standard error 7.8), out of a total of 338 items. The VRIN score (amongst those with at least 90% response rate for VRIN items) was 58.6 (standard error 3.4). The TRIN score (amongst those with at least 90% response rate for TRIN items) was 60.3 (standard error 2.1).

For the results in the table below, participants were only included if there was no evidence of possible variable or fixed reporting, and if they gave at least 90% valid responses for the scale in question.

| Scale                                      | T-score | Standard Error | n  |
|--------------------------------------------|---------|----------------|----|
| <i>Validity</i>                            |         |                |    |
| FR                                         | 75.4    | 5.9            | 18 |
| FPR                                        | 58.9    | 4.5            | 18 |
| FS                                         | 73.6    | 5.1            | 18 |
| FBSR                                       | 66.9    | 4.1            | 18 |
| LR                                         | 60.8    | 2.5            | 17 |
| KR                                         | 45.6    | 1.6            | 18 |
| <i>Higher-order</i>                        |         |                |    |
| EID - Emotional/Internalizing Dysfunction  | 59.6    | 3.3            | 17 |
| THD - Thought Dysfunction                  | 57.8    | 2.6            | 16 |
| BXD - Behavioral/Externalizing Dysfunction | 46.0    | 2.4            | 18 |
| <i>RC (Restructured Clinical)</i>          |         |                |    |
| RCd – Demoralization                       | 60.4    | 2.8            | 18 |
| RC1 - Somatic Complaints                   | 70.6    | 4.5            | 17 |
| RC2 - Low Positive Emotions                | 61.8    | 4.7            | 16 |
| RC3 – Cynicism                             | 52.1    | 1.7            | 17 |
| RC4 - Antisocial Behavior                  | 47.4    | 2.1            | 18 |
| RC6 - Ideas of Persecution                 | 55.7    | 2.6            | 17 |
| RC7 - Dysfunctional Negative Emotions      | 55.0    | 2.6            | 17 |
| RC8 - Aberrant Experiences                 | 63.8    | 2.6            | 16 |
| RC9 - Hypomanic Activation                 | 47.8    | 2.6            | 17 |
| <i>Somatic/cognitive</i>                   |         |                |    |
| MLS – Malaise                              | 66.3    | 3.4            | 18 |
| GIC - Gastrointestinal Complaints          | 60.2    | 4.2            | 18 |
| HPC - Head Pain Complaints                 | 63.6    | 3.0            | 18 |
| NUC - Neurological Complaints              | 71.4    | 4.6            | 17 |
| COG - Cognitive Complaints                 | 76.7    | 3.7            | 16 |
| <i>Internalizing Scales</i>                |         |                |    |
| SUI - Suicidal/Death Ideation              | 59.7    | 5.4            | 15 |
| HLP - Helplessness/Hopelessness            | 58.5    | 3.0            | 17 |
| SFD - Self-Doubt                           | 58.6    | 2.6            | 17 |
| NFC – Inefficacy                           | 56.2    | 2.5            | 16 |
| STW - Stress/Worry                         | 52.8    | 3.4            | 15 |
| AXY – Anxiety                              | 64.6    | 5.3            | 16 |
| ANP - Anger Proneness                      | 51.8    | 1.9            | 17 |
| BRF - Behavior-Restricting Fears           | 61.5    | 3.8            | 18 |
| MSF - Multiple Specific Fears              | 47.6    | 1.3            | 16 |
| <i>Externalising</i>                       |         |                |    |
| JCP - Juvenile Conduct Problems            | 48.3    | 2.1            | 17 |
| SUB - Substance Abuse                      | 45.9    | 1.6            | 17 |
| AGG – Aggression                           | 47.7    | 2.4            | 17 |

|                                                         |      |     |    |
|---------------------------------------------------------|------|-----|----|
| ACT – Activation                                        | 48.6 | 1.9 | 17 |
| <i>Interpersonal Scales</i>                             |      |     |    |
| FML - Family Problems                                   | 52.4 | 3.0 | 17 |
| IPP - Interpersonal Passivity                           | 50.6 | 2.2 | 15 |
| SAV - Social Avoidance                                  | 58.3 | 3.6 | 16 |
| SHY – Shyness                                           | 50.3 | 2.2 | 14 |
| DSF – Disaffiliativeness                                | 59.3 | 3.3 | 16 |
| <i>Interest Scales</i>                                  |      |     |    |
| AES - Aesthetic-Literary Interests                      | 42.9 | 2.6 | 16 |
| MEC - Mechanical-Physical Interests                     | 46.3 | 2.3 | 16 |
| <i>Personality Psychopathology Five (PSY-5) Scales</i>  |      |     |    |
| AGGR-r - Aggressiveness-Revised                         | 49.6 | 2.3 | 16 |
| PSYC-r - Psychoticism-Revised                           | 58.1 | 2.0 | 17 |
| DISC-r - Disconstraint-Revised                          | 44.2 | 2.4 | 17 |
| NEGE-r - Negative Emotionality/Neuroticism-Revised      | 56.4 | 3.7 | 18 |
| INTR-r - Introversion/Low Positive Emotionality-Revised | 61.2 | 4.4 | 17 |
